# Supplementary material
Source: publisher figshare collection journal article supplement (https://frontiersin.figshare.com/ndownloader/files/31546265)

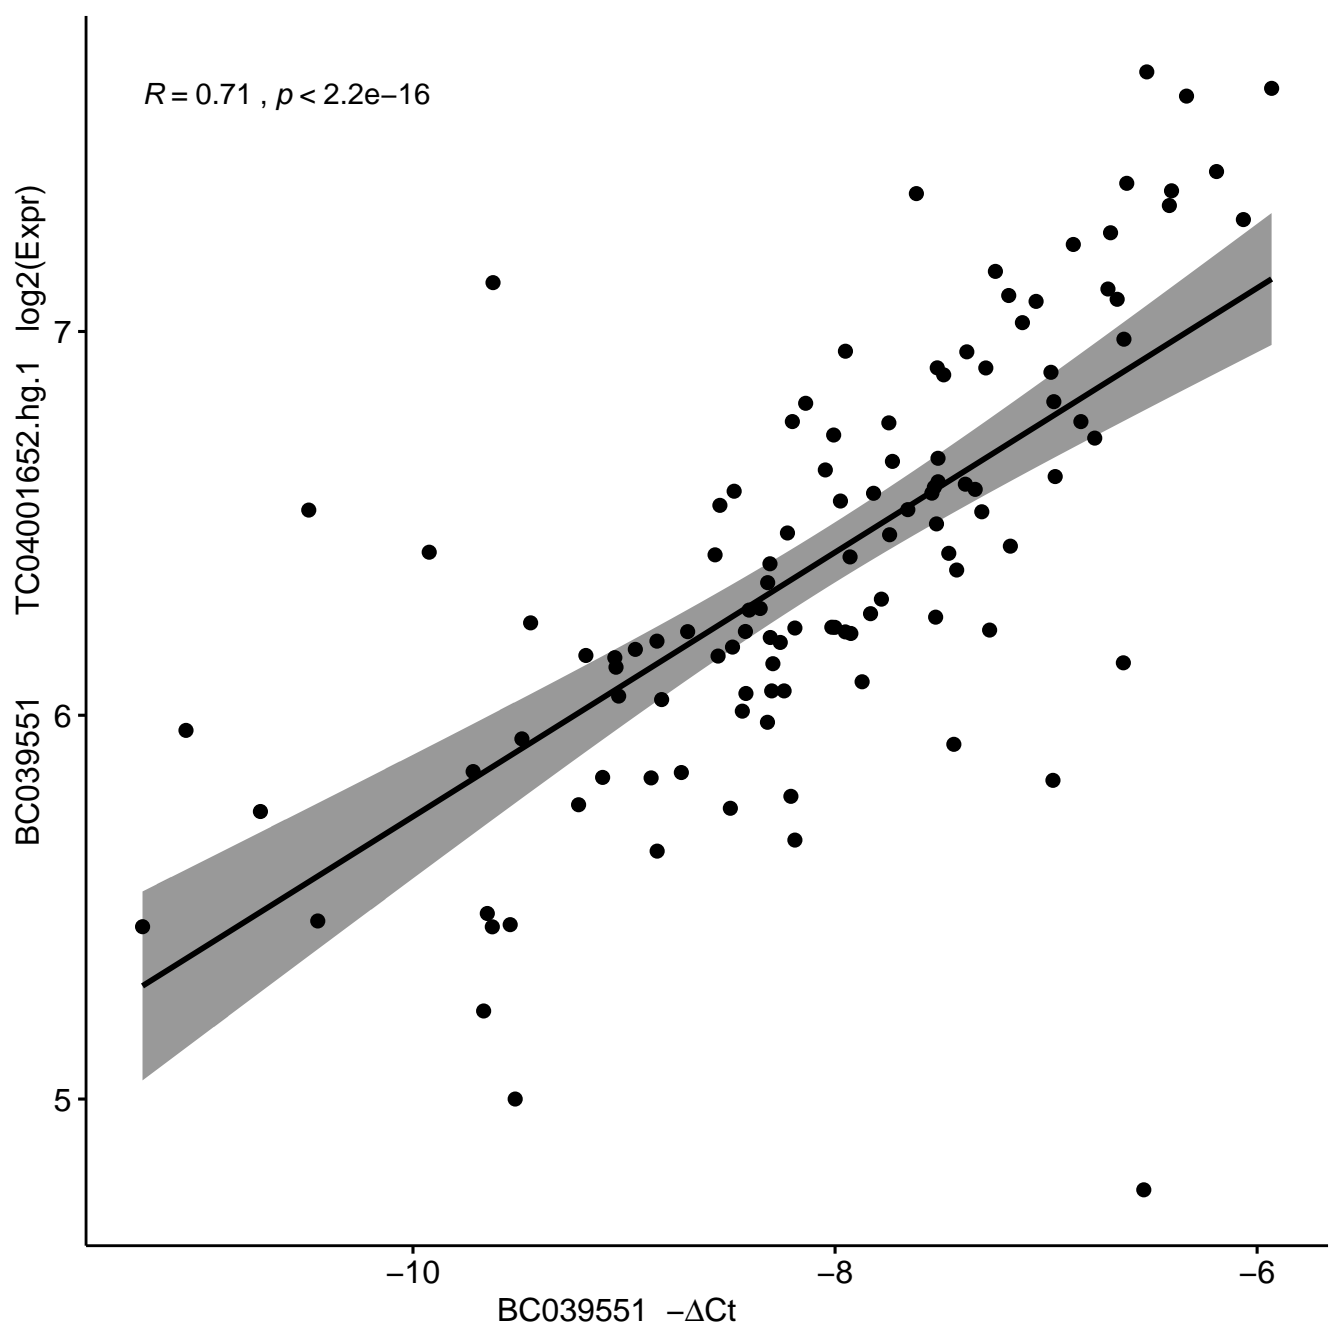

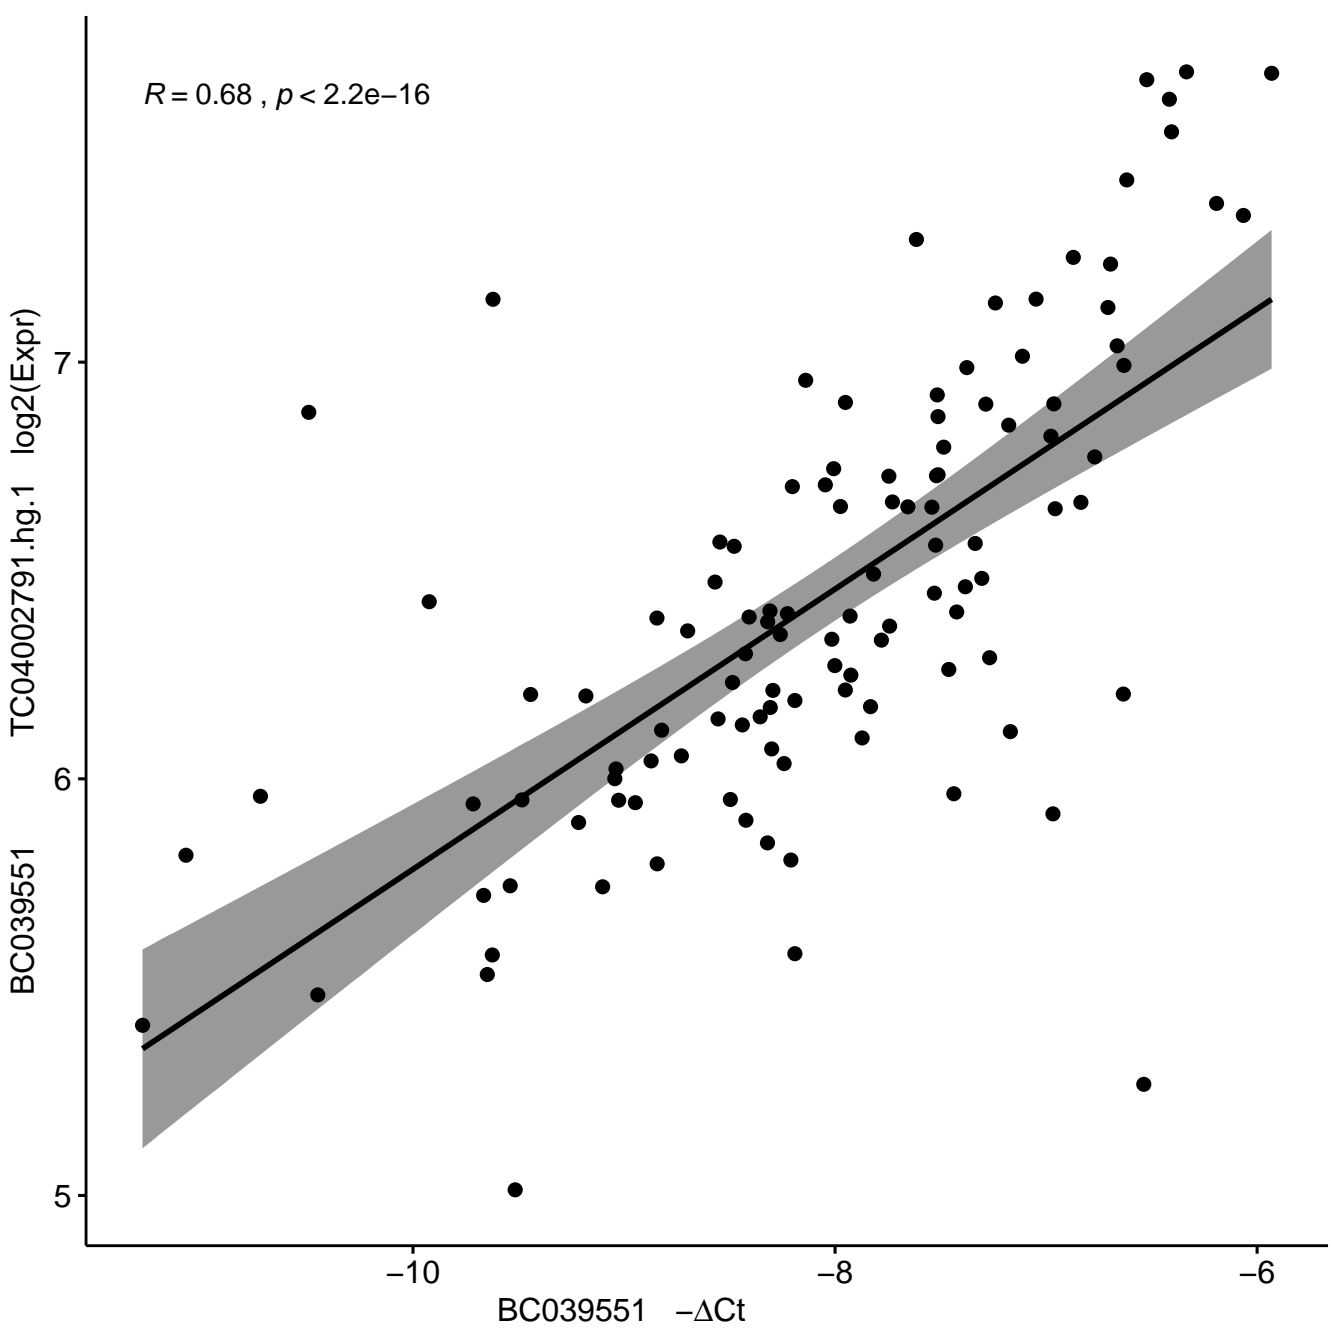

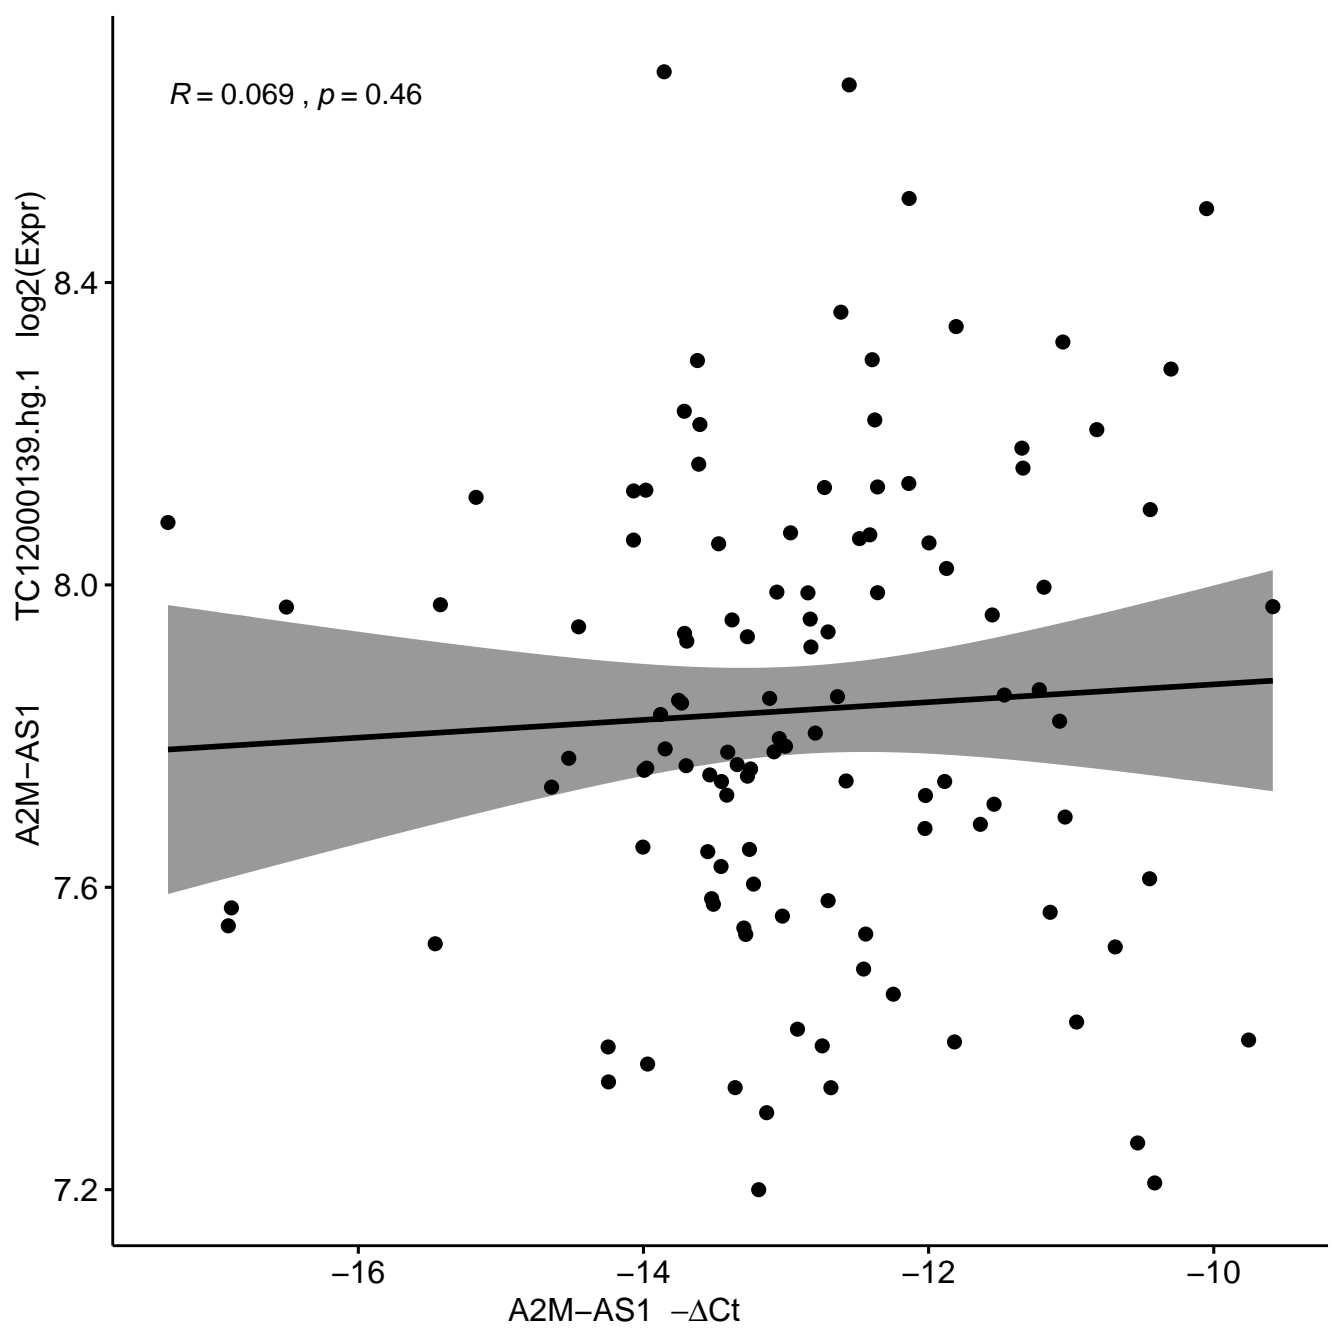

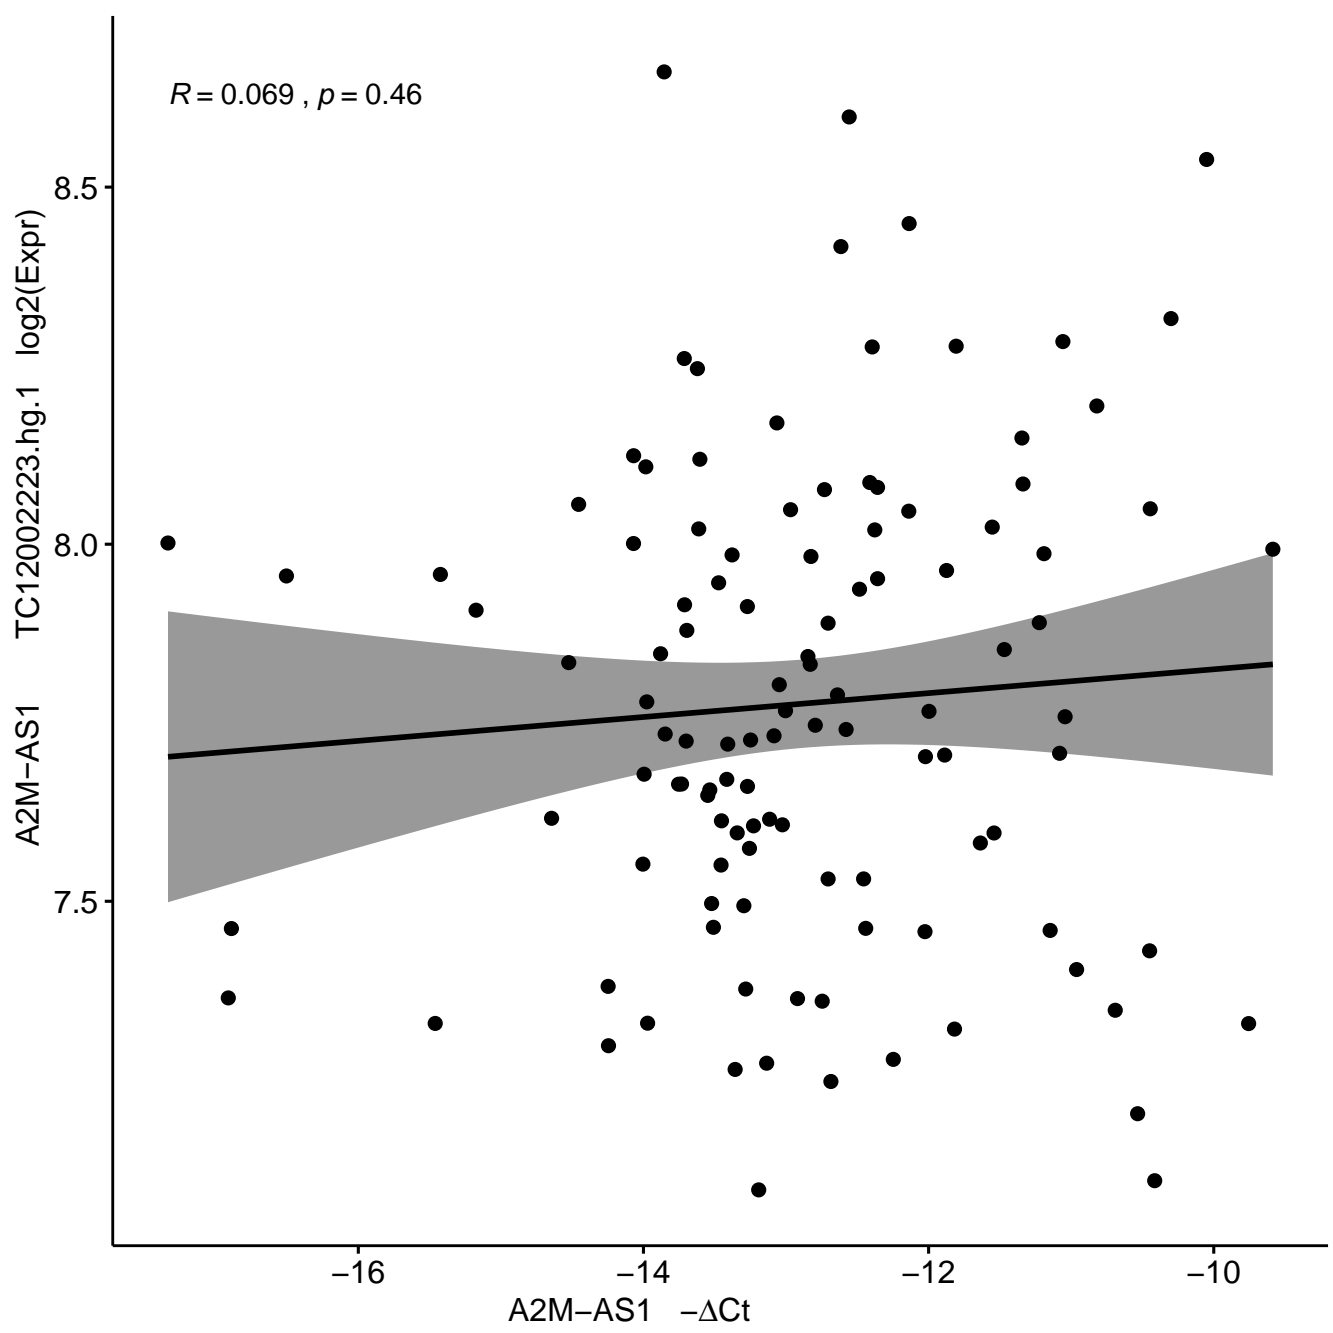

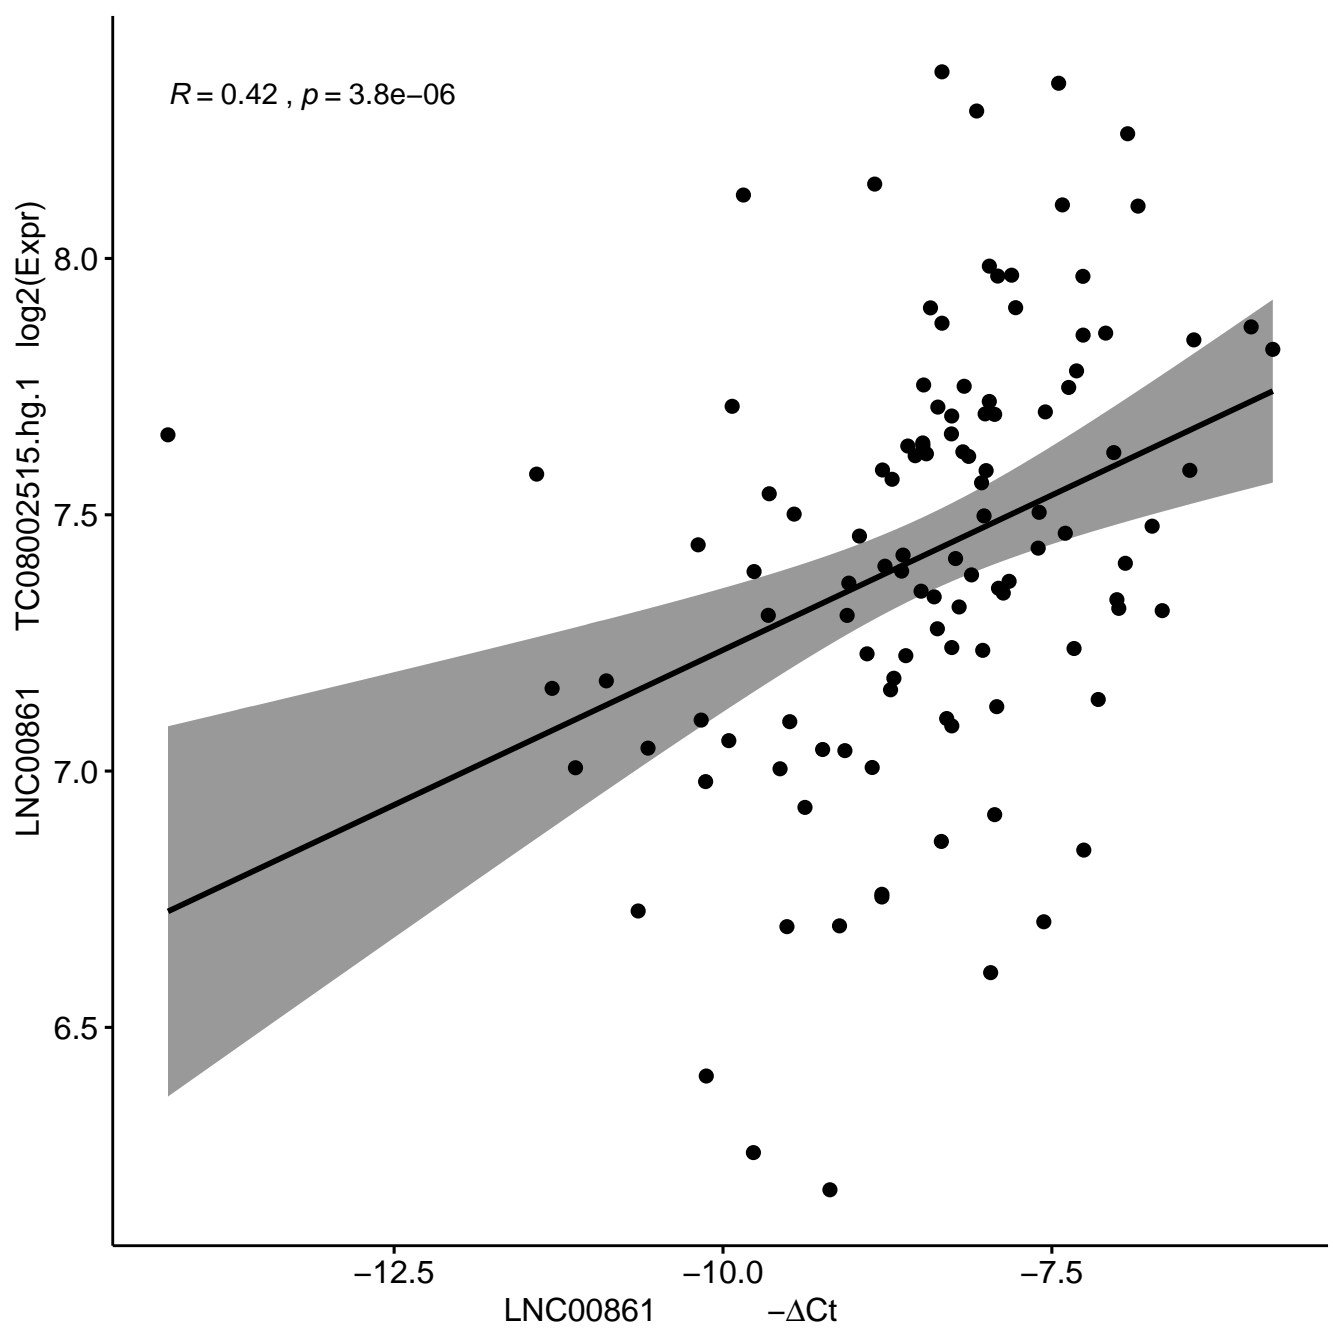

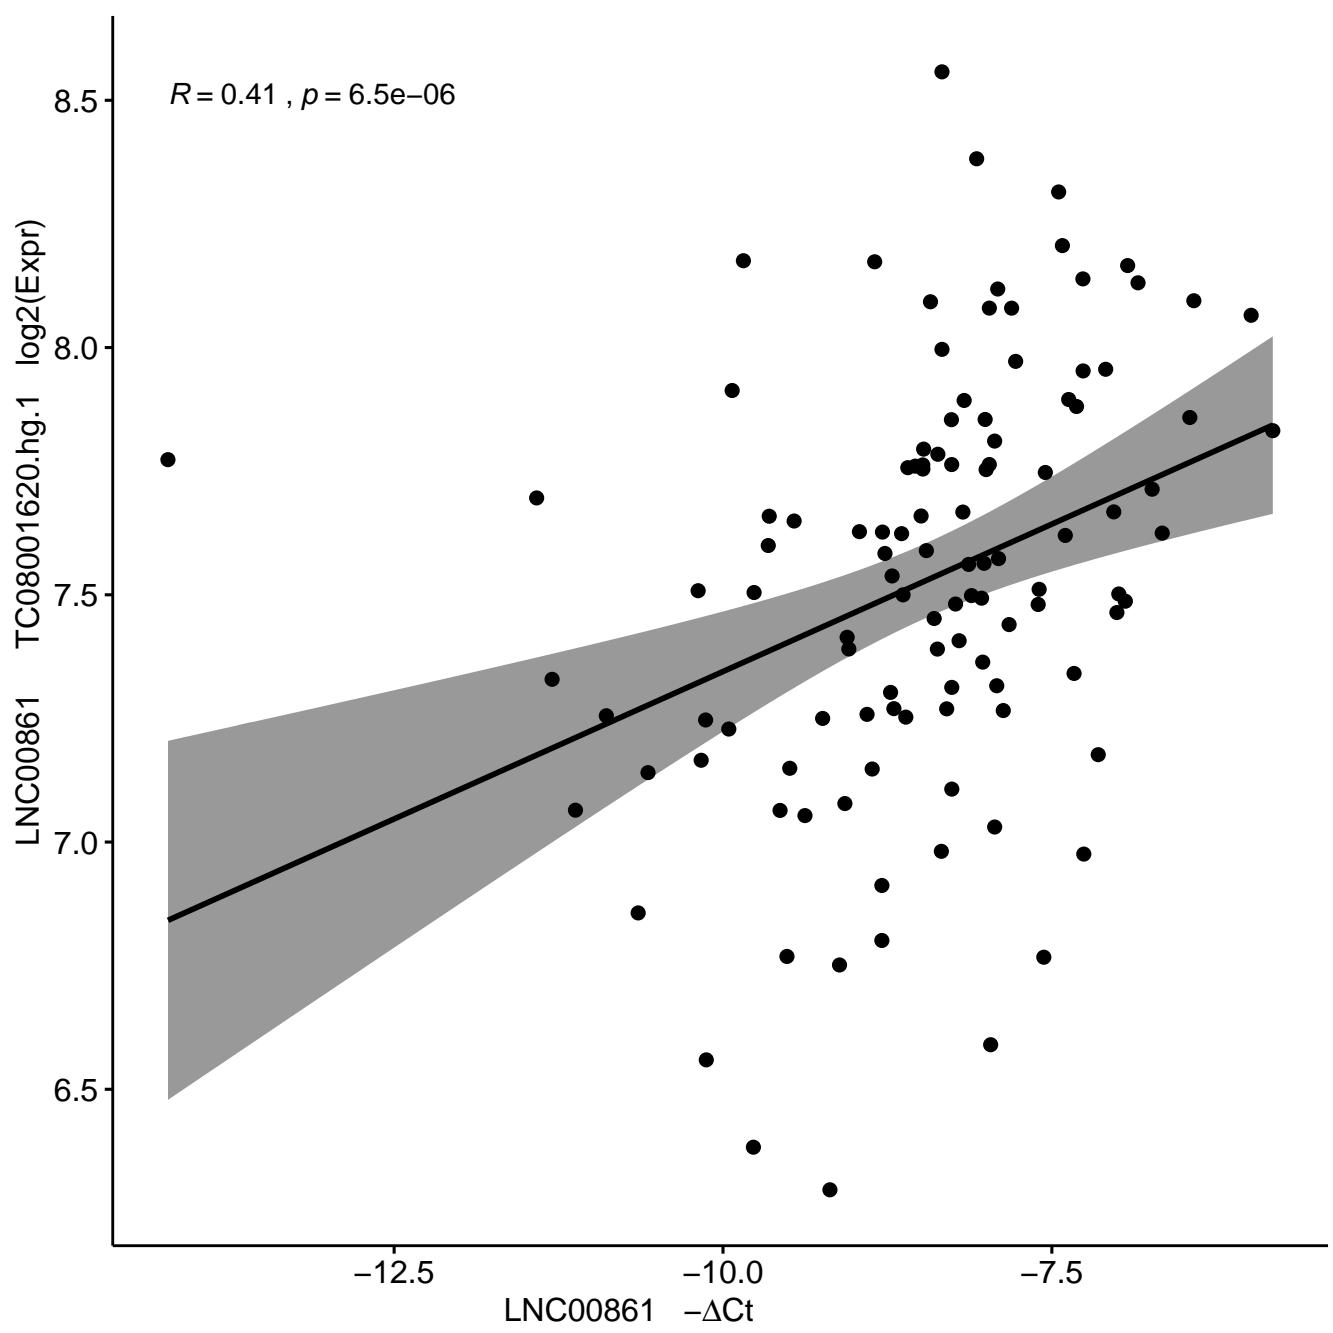

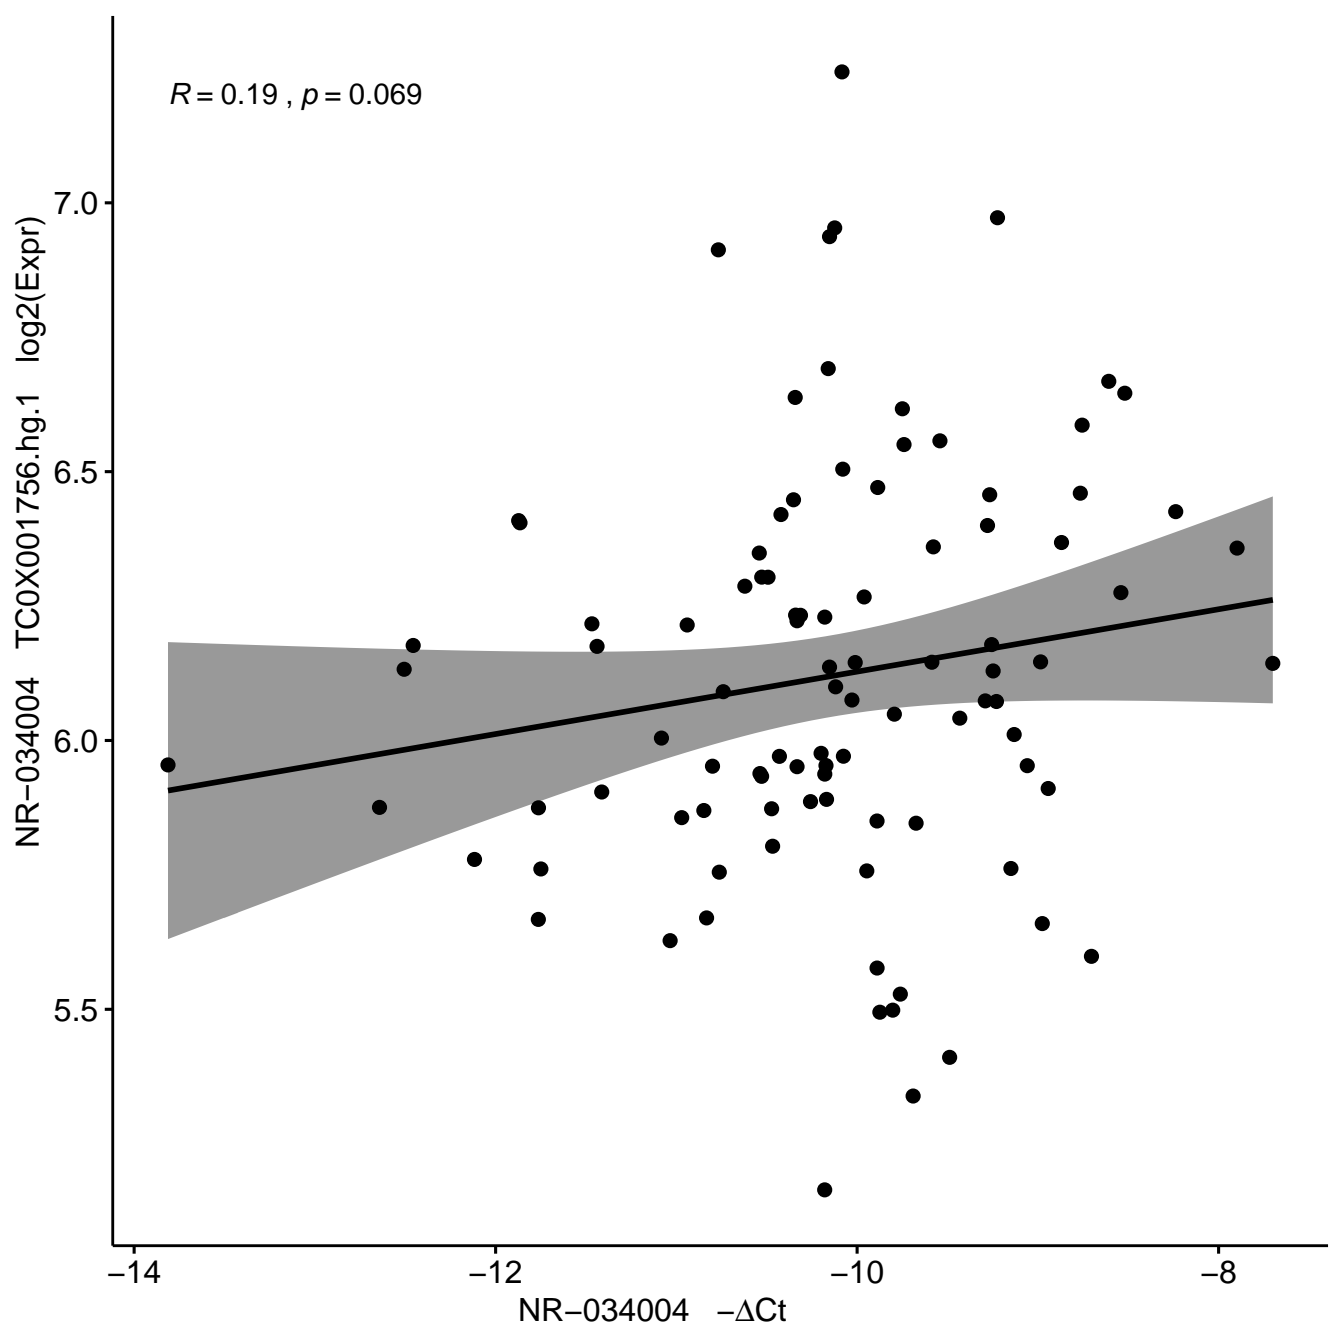

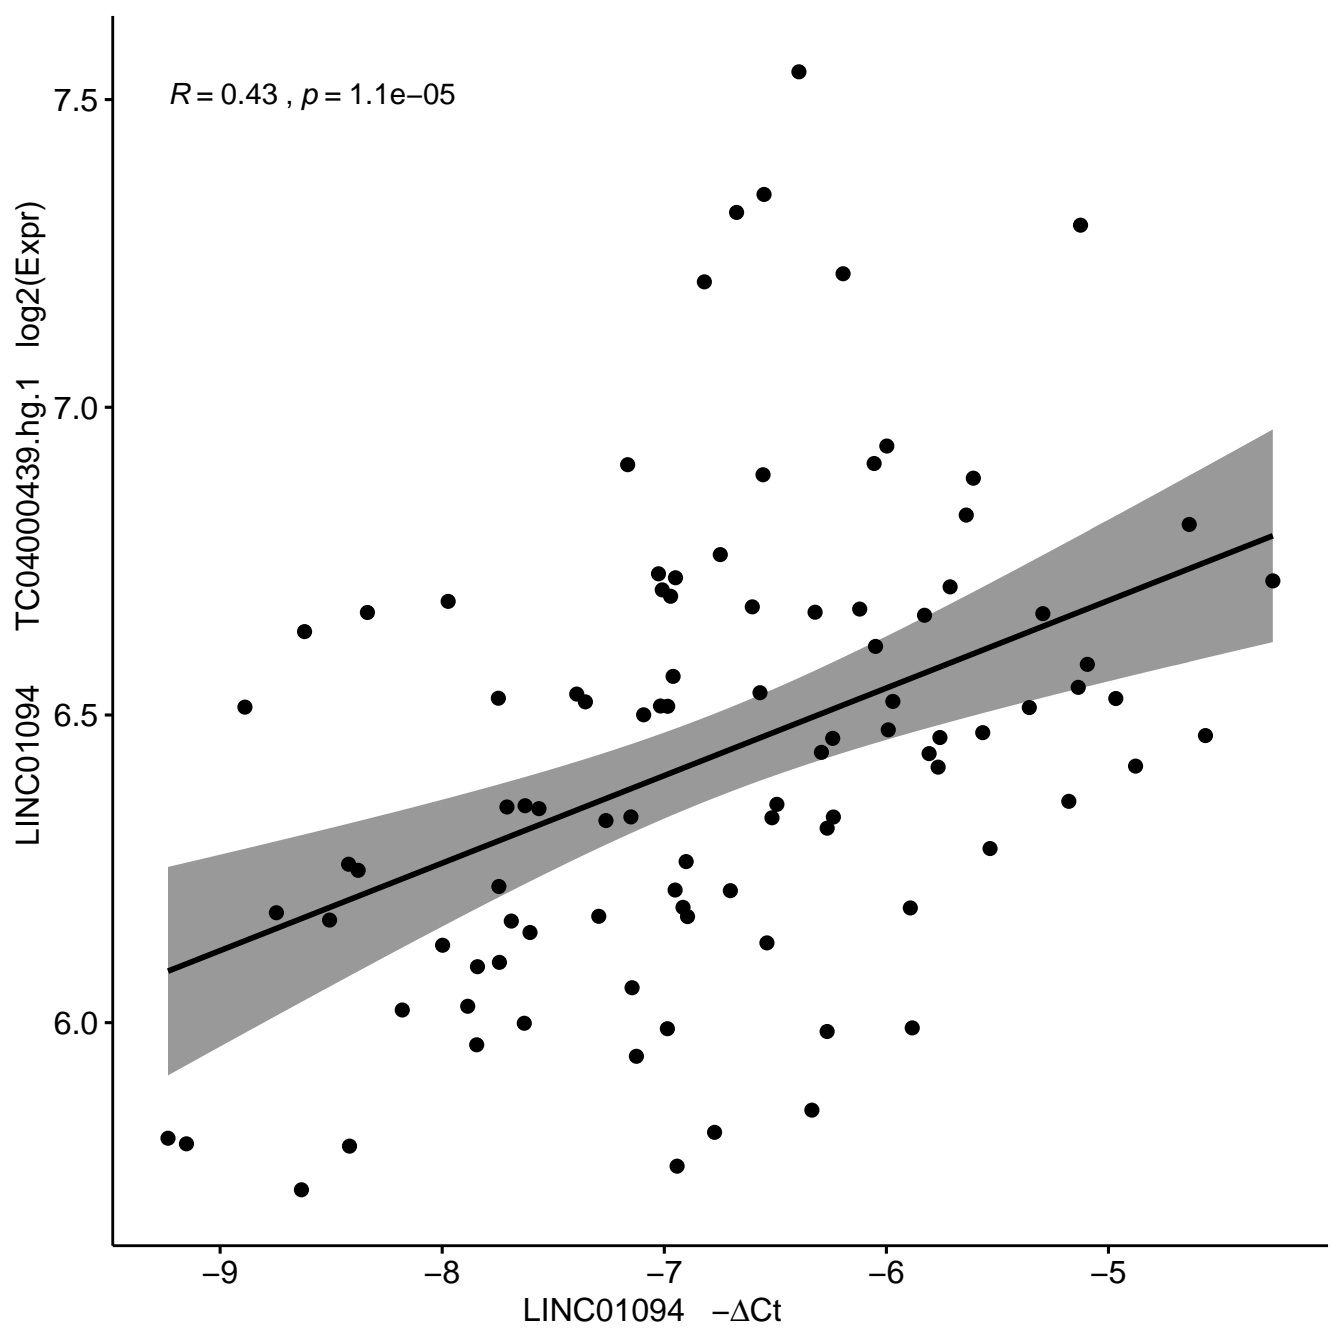



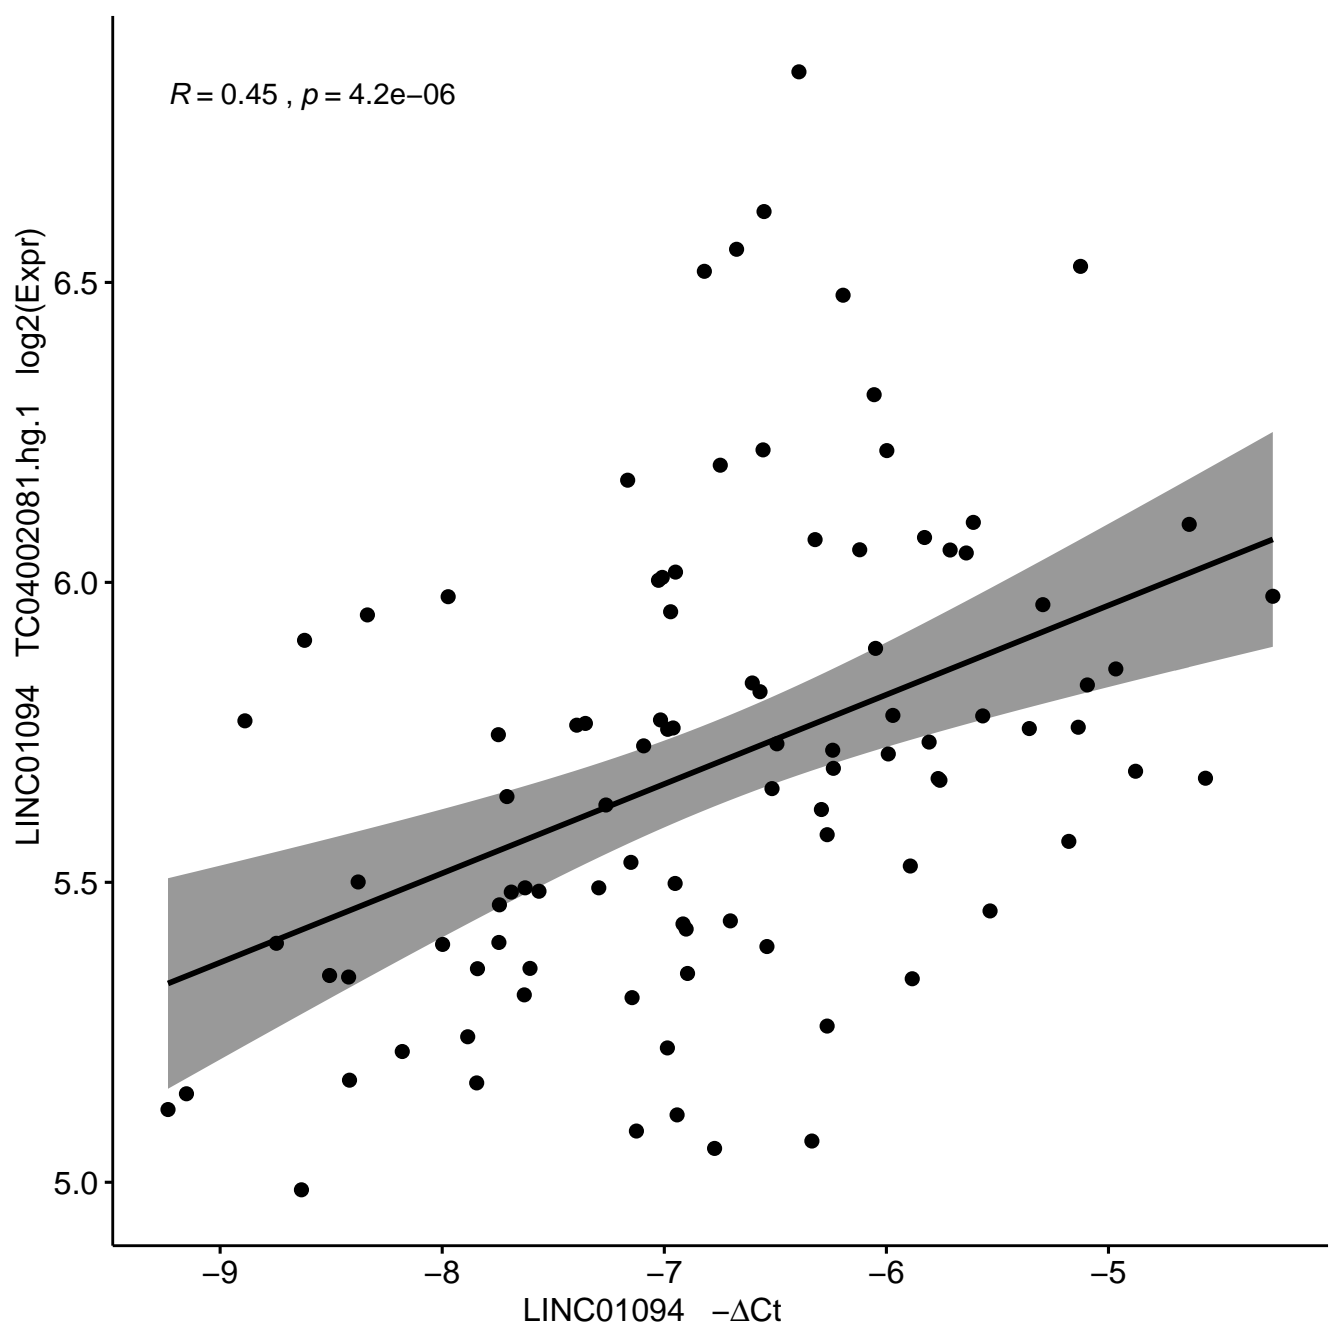

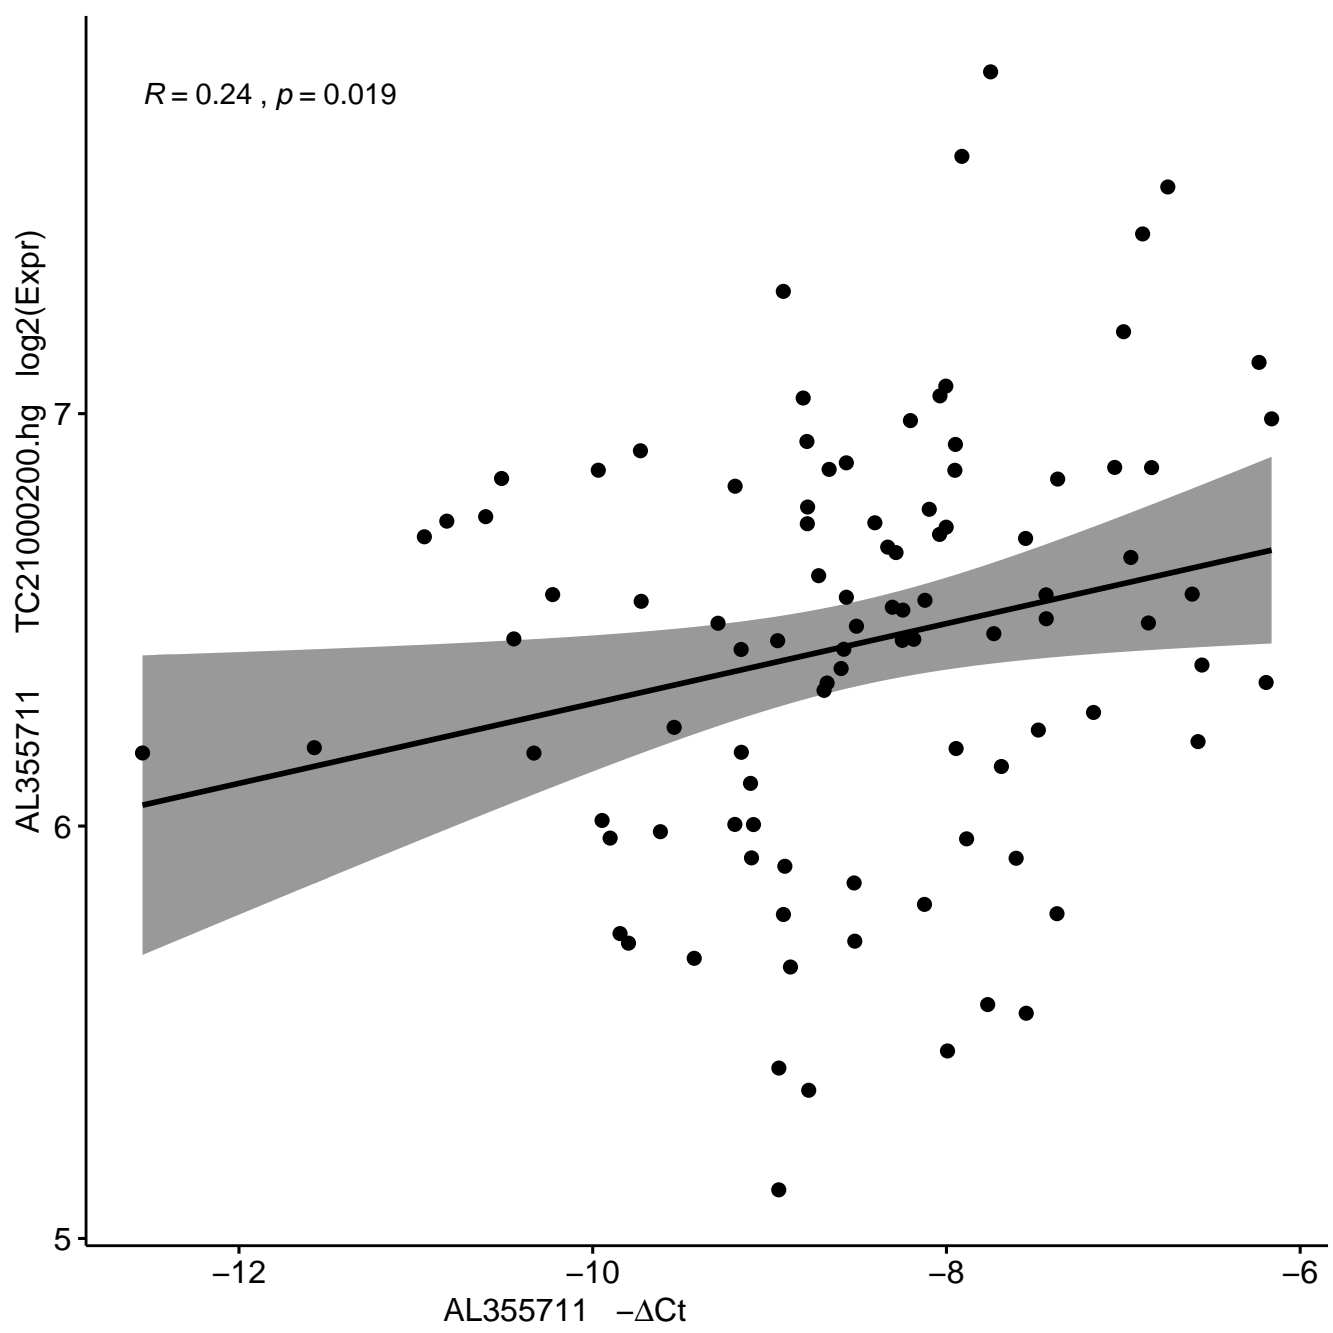

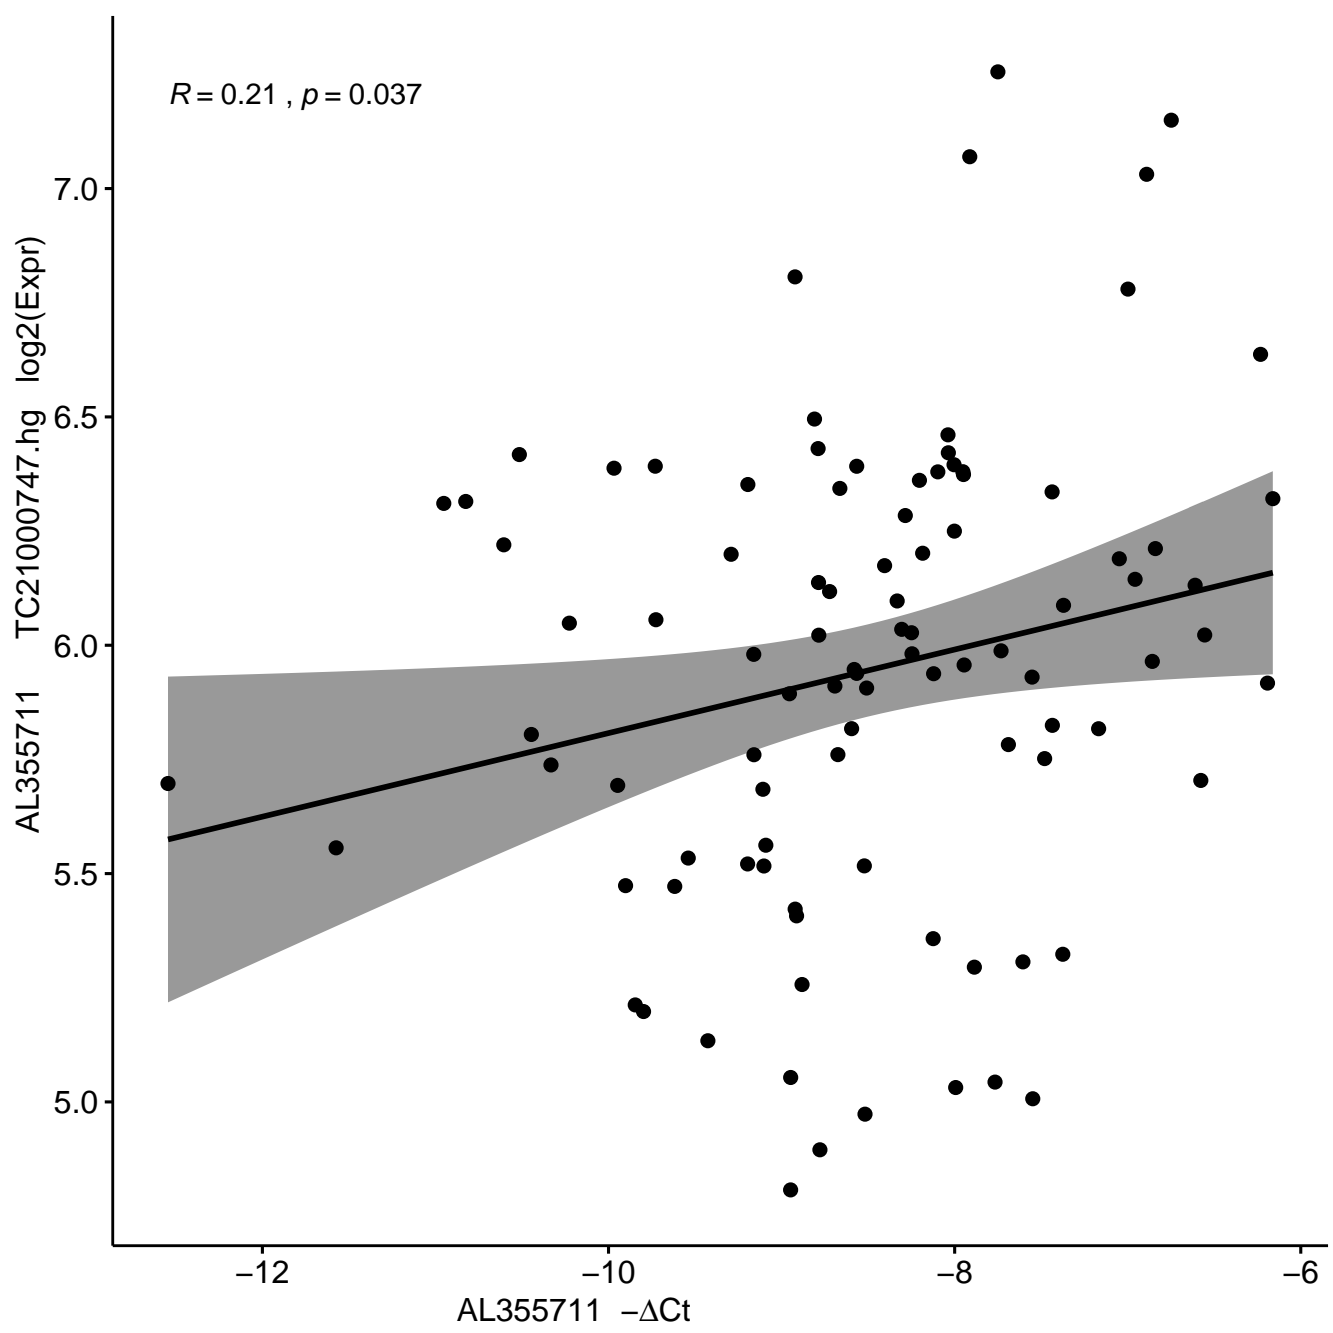

Supplement: Supplementary file [file 31546265]
